# Supplementary material for: AtPPRT1, an E3 Ubiquitin Ligase, Enhances the Thermotolerance in Arabidopsis
Source: PubMed Central journal article supplement (PMC7569766; doi:10.3390/plants9091074), 2020-08-21
Supplement: plants-09-01074-s001.pdf [file plants-09-01074-s001.pdf]

Article

# AtPPRT1, an E3 Ubiquitin Ligase, Enhances the Thermotolerance in *Arabidopsis*

Yu Liu, Shuya Xiao, Haoran Sun, Linsen Pei, Yingying Liu, Lu Peng, Xuemeng Gao, Yu Liu, Jianmei Wang \*

Supplementary Materials:

**Table S1.** Primers used in this study.

|                         |                                   |
|-------------------------|-----------------------------------|
| <i>ACTIN2</i> -F        | ACATCCCACCTACTGGTCTGAAG           |
| <i>ACTIN2</i> -R        | GCATCTTGGTATTGCTGGTACTCT          |
| qRT- <i>AtPPRT1</i> -F  | CATCCTTTTCATGCGCTTAGAG            |
| qRT- <i>AtPPRT1</i> -R  | AATTCACGAGCTGATGATGTTG            |
| qRT- <i>GUS</i> -F      | ATACCGAAAGGTTGGGCAGG              |
| qRT- <i>GUS</i> -R      | TCTTGCCGTTTTTCGTCGGTA             |
| qRT- <i>AtZAT12</i> -F  | GAGTCACAAGAAGCCTAACACGA           |
| qRT- <i>AtZAT12</i> -R  | AAGCCACTCTCTTCCCACTGCTA           |
| qRT- <i>AtHSP21</i> -F  | ATGGCTTCTACACTCTCATTGCTGCATCGGCTC |
| qRT- <i>AtHSP21</i> -R  | AGAGACGTCCATGGTTAAGCGTTGTTGAGGTC  |
| qRT- <i>AtHSPA7a</i> -F | AACACTGACCACATCGTATCTT            |
| qRT- <i>AtHSPA7a</i> -R | GAGAATCGTGGAGAAAGAATGC            |

**Table S2.** The accession numbers of genes used in this study.

| Gene Name       | Accession Number |
|-----------------|------------------|
| <i>AtPPRT1</i>  | AT1G68820        |
| <i>AtZAT12</i>  | AT5G59820        |
| <i>AtHSP21</i>  | AT4G27670        |
| <i>AtHSPA7a</i> | AT3G51910        |
